# Supplementary material
Source: publisher figshare collection journal article supplement (https://tandf.figshare.com/articles/dataset/_/7072871)

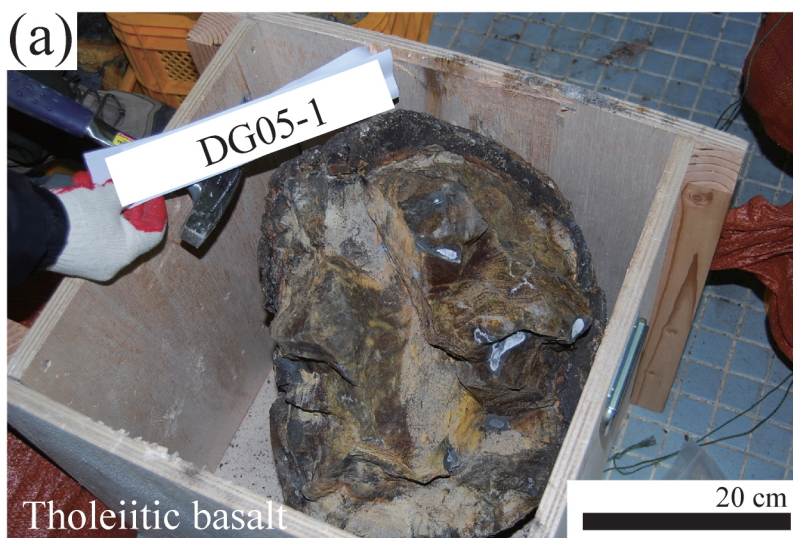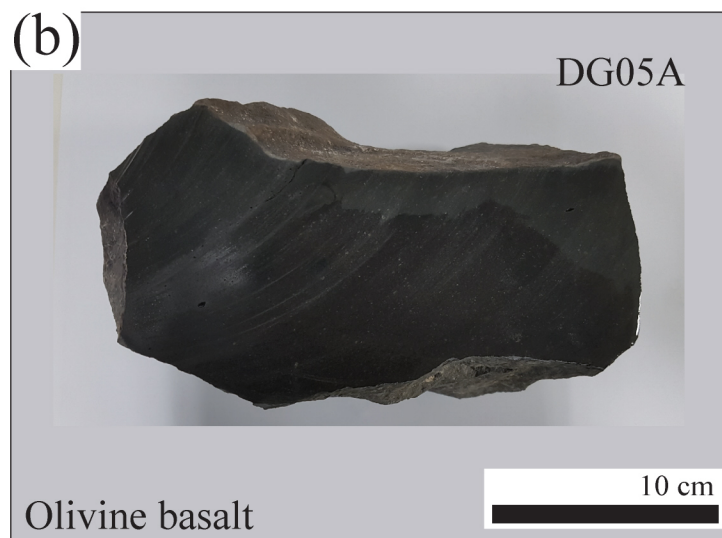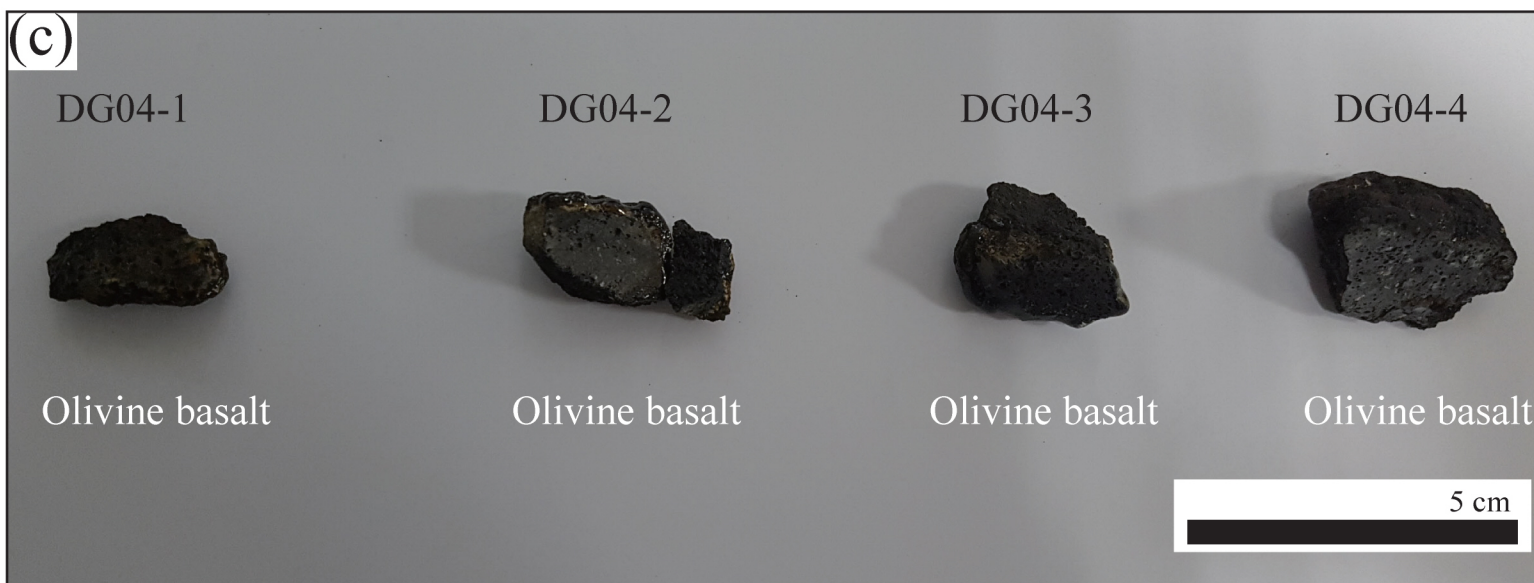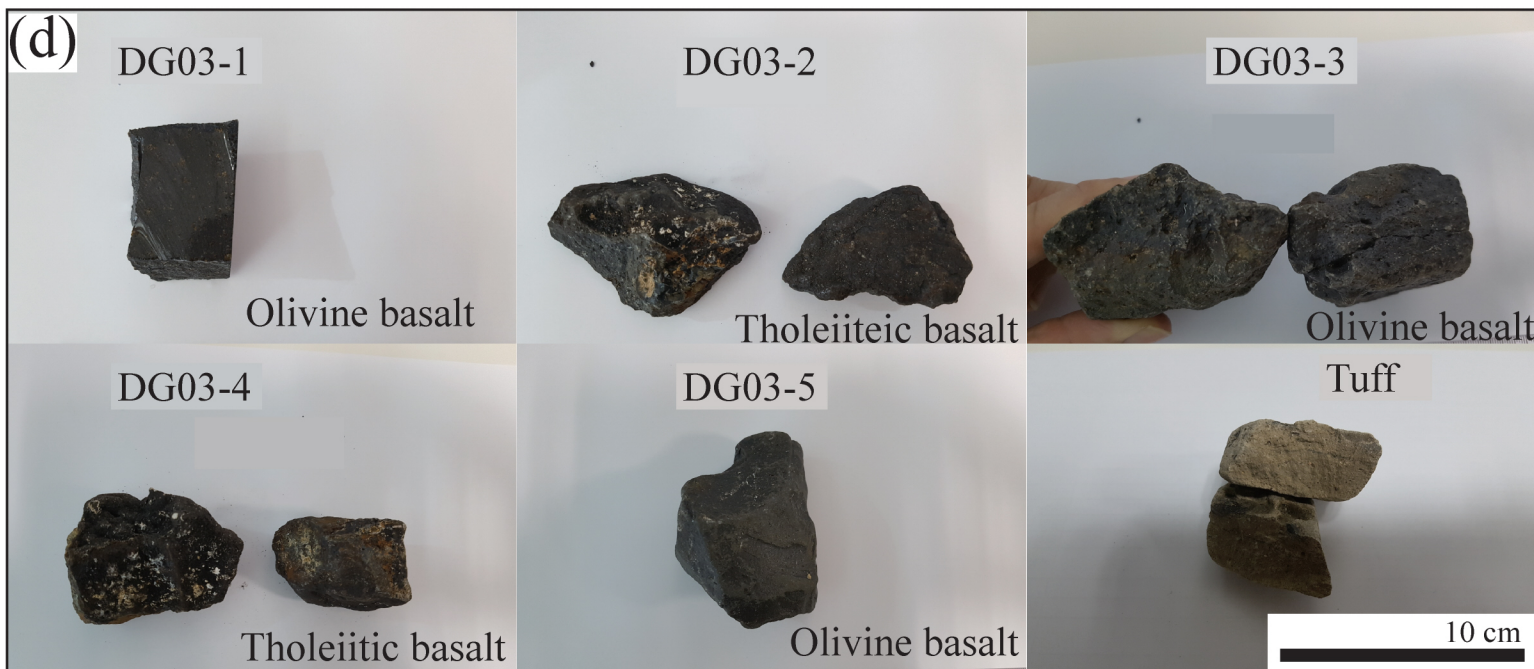

Supplementary Figure 1



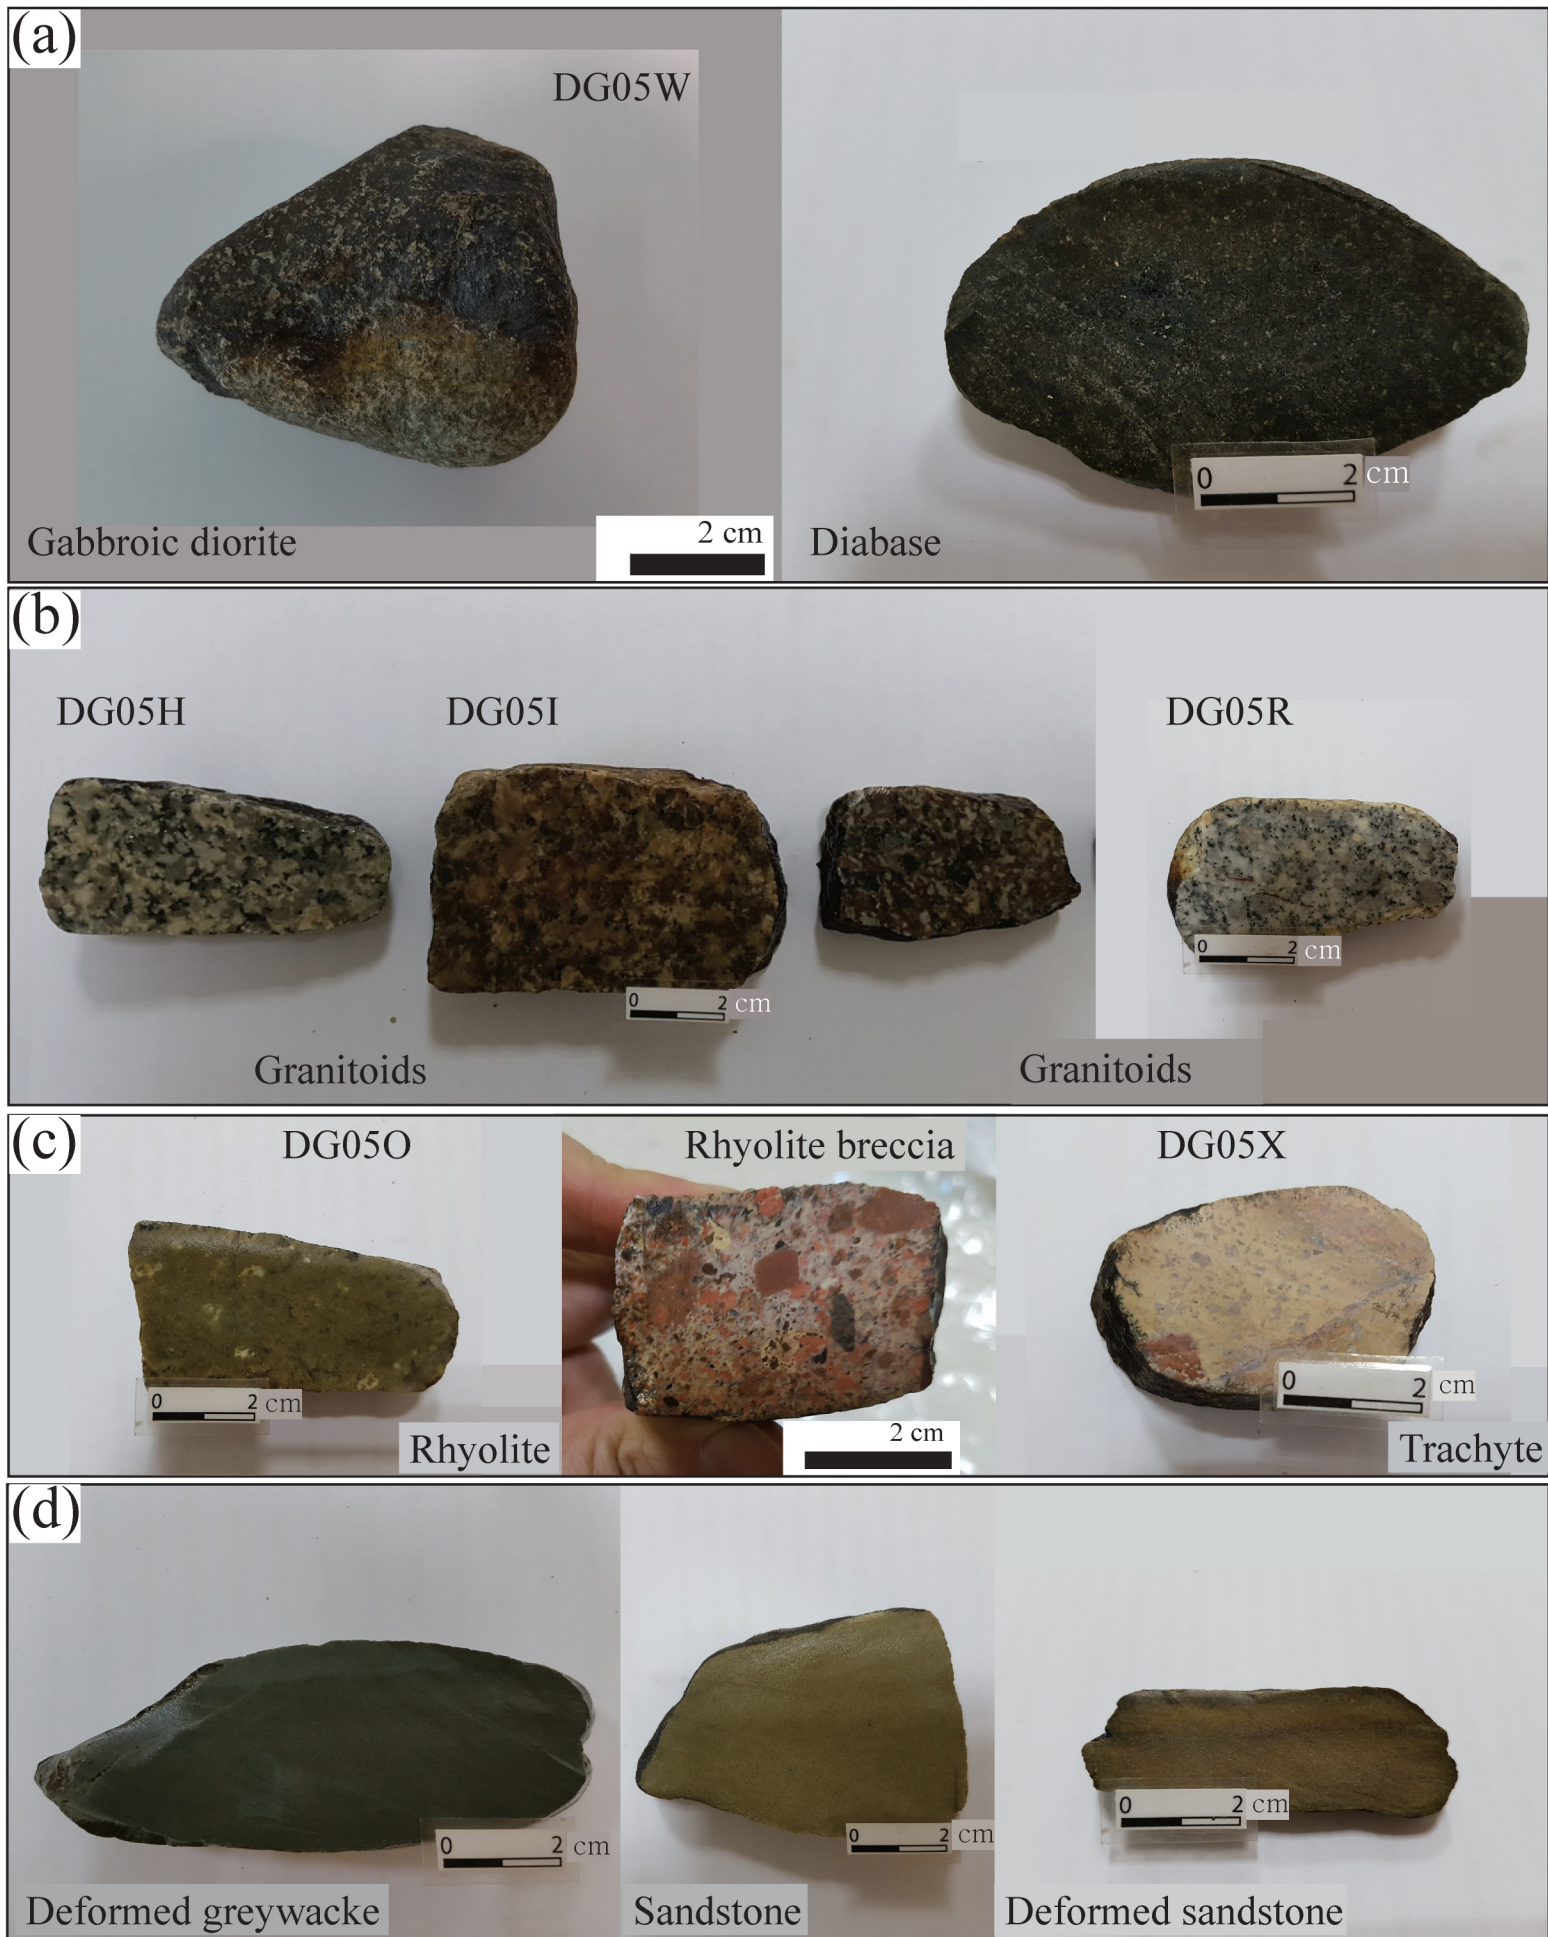

Supplementary Figure 2

Supplement: Supplementary file 1 [file 1]
